# Supplementary material for: An oxygen-assisted conversion of butanol to value-added products on nanocarbon catalysts: tuning product selectivity via nitrogen doping
Source: Royal Society of Chemistry journal article supplement (doi:10.1039/d2cy02075k), 2023-01-01
Supplement: d2cy02075k1.pdf [file d2cy02075k1.pdf]

# Oxygen assisted conversion of butanol to value-added product on nanocarbon catalysts: tuning product selectivity via nitrogen doping

Xueya Dai,<sup>‡a,b</sup> Fan Li,<sup>‡a,b,c</sup> Di Wang,<sup>a</sup> Miao Guo,<sup>a</sup> Yunli Bai,<sup>a,b</sup> Wei Qi<sup>\*a,b</sup>

<sup>a</sup> Shenyang National Laboratory for Materials Science Institute of Metal Research, Chinese Academy of Sciences, Shenyang, Liaoning, 110016, P. R. China.

<sup>b</sup> School of Materials Science and Engineering University of Science and Technology of China, Shenyang, Liaoning, 110016, P. R. China.

<sup>c</sup> Shanghai Shaanxi Coal Hi-tech Research Institute Co., Ltd., Shanghai, 201616, P. R. China.

Corresponding Author, E-mail: wqi@imr.ac.cn

<sup>‡</sup> These authors contributed equally to this work.

Table S1 N 1s and O 1s XPS analysis results of OCNT and NCNT catalysts (after reaction)

| Samples | N1 (%) | N2 (%) | N3 (%) | N4 (%) | O1 (%) | O2 (%) | O3 (%) | O4 (%) |
|---------|--------|--------|--------|--------|--------|--------|--------|--------|
| NCNT700 | 24.7   | 20.0   | 50.6   | 24.7   | 25.9   | 42.6   | 31.5   | 0      |
| NCNT800 | 35.7   | 12.5   | 35.7   | 16.1   | 22.9   | 52.1   | 25.0   | 0      |
| NCNT900 | 27.8   | 22.2   | 38.9   | 11.1   | 25.5   | 46.8   | 27.7   | 0      |
| OCNT    | -      | -      | -      | -      | 17.4   | 34.8   | 43.5   | 4.3    |

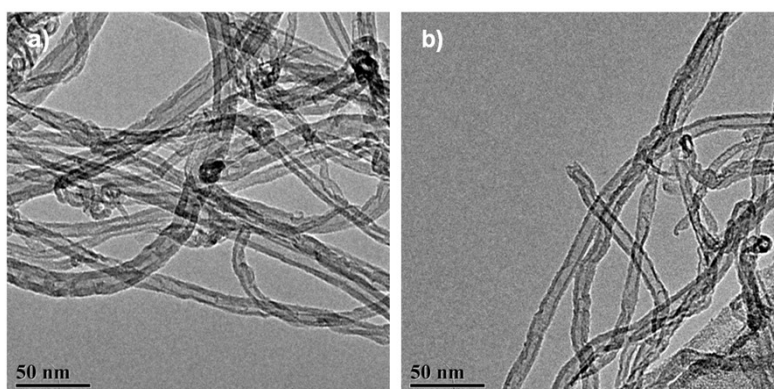

Fig. S1. TEM images of OCNT.

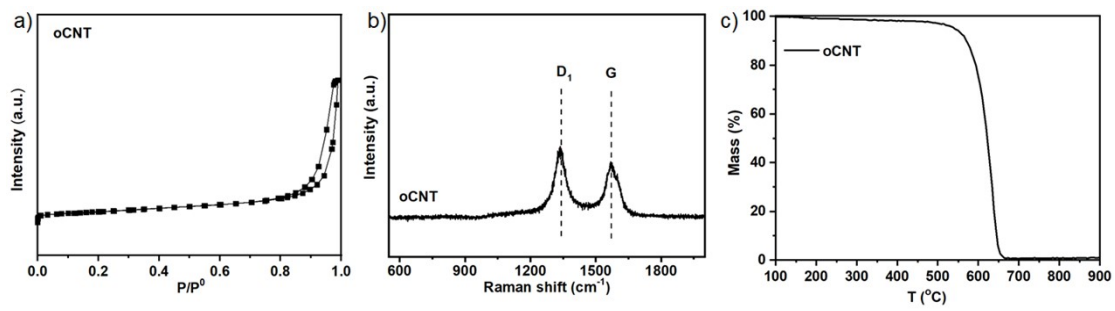

Fig. S2. N<sub>2</sub> adsorption-desorption isotherms (a), Raman spectra (b) and Thermogravimetric analysis profiles (c) of oCNT samples.
